# Supplementary material for: Quantitative Proteomic Analysis of Serum Proteins from Oral Cancer Patients: Comparison of Two Analytical Methods
Source: Int J Mol Sci. 2014 Aug 18;15(8):14386–95. doi: 10.3390/ijms150814386 (PMC4159857; doi:10.3390/ijms150814386)
Supplement: Supplementary File 1 [file ijms-15-14386-s001.xls]

## Sheet: Sheet1
Protein name	Ratio (OSCC : Ctrl)
A2M 13 kDa protein	0.52
A2M 19 kDa protein	0.79
A2M protein	0.587738
ADP-ribosylation factor-like protein 6	1.03
AF4/FMR2 family member 3	0.88
Afamin precursor	1.28
ALB protein	1.1681
Albumin-like protein	1.09664
Alpha 1B-glycoprotein	2.6
Alpha 2 macroglobulin	1.33168
Alpha 2 macroglobulin variant	1.49524
Alpha-1-antichymotrypsin precursor	1.36
Alpha-1-antitrypsin precursor	2.19
Alpha-2-glycoprotein 1, zinc	0.48
Alpha-2-HS-glycoprotein precursor	1.28
Alpha-2-macroglobulin precursor	0.8975
Anaphase-promoting complex subunit 7	1.08
Angiotensinogen	0.580235
Anitubulin IgG1 kappa VL chain	1.22515
Ankyrin repeat domain-containing protein 49	0.71
Ankyrin-3	1.03
Anti TNF-alpha antibody light-chain Fab fragment	0.609878
Anti-(ED-B) scFV	0.267899
Antibody light chain	0.780515
Anti-HBsAg immunoglobulin Fab kappa chain	1.48406
Anti-HIV-1 gp120 immunoglobulin 48d heavy chain	0.771117
Anti-peptide/MHC complex HLA-A1/MAGE-A1 monoclonal antibody heavy chain	1.25109
Anti-rabies virus immunoglobulin light chain variable region	2.52446
Anti-tetanus toxoid immunoglobulin light chain variable region	1.17016
Antithrombin III	1.86
Antithrombin III variant	1.06
Apolipoprotein A1	1.605
Apolipoprotein A-I precursor	2.905
Apolipoprotein A-IV precursor	1.28
Apolipoprotein B (including Ag(x) antigen), isoform CRA_b	1.27809
Apolipoprotein B precursor	1.36604
Apolipoprotein B variant	1.54115
Apolipoprotein B-100 precursor	1.35
Apolipoprotein C-II	1.16677
Apolipoprotein C-III	2.01569
Apolipoprotein C-III precursor	2.29
Apolipoprotein D, Peptide, 246 aa	0.920152
Apolipoprotein E	0.913645
Apolipoprotein J precursor	1.39771
Apolipoprotein L-I	1.61318
ARL6 17 kDa protein	1.03
Beta-2-glycoprotein 1	1.26675
Beta-globin	0.950813
B-factor, properdin	0.7275
Biotinidase	0.709032
C1-inhibitor	2.66144
C2 protein	1.23076
C3 13 kDa protein	0.816
C3 187 kDa protein	0.892
C3 5 kDa protein	0.81
C4A variant protein	1.4944
Carboxypeptidase N catalytic chain precursor	1.34597
CD14 protein precursor	0.749006
Centrosomal protein 110kDa	1.4
Centrosome-associated protein 350	0.74
Ceruloplasmin	1.3525
Ceruloplasmin CpF5 fragment	0.821782
Chain A, Alpha-1- Antitrypsin	1.04325
Chain A, alpha1-antichymotrypsin	1.63832
Chain A, anti-P185-Her2 Antibody 4d5	2.31209
Chain A, Antithrombin Ii	2.71596
Chain A, apolipoprotein A-I	1.2528
Chain A, Apolipoprotein C-Ii	1.43575
Chain A, apolipoprotein C-Iii	1.98308
Chain A, apolipoprotein E3	0.797898
Chain A, Bb segment of factor B	1.1623
Chain A, C4adg fragment of complement factor C4a	1.30296
Chain A, cleaved antichymotrypsin A349r	0.347584
Chain A, complement component C3	3.18966
Chain A, complement control protein	1.11398
Chain A, domain of factor B	1.02701
Chain A, Fab fragment, myeloma Immunoglobulin IgG	1.11423
Chain A, Fibronectin	1.18905
Chain A, Human Factor VIII C2 Domain	1.09656
Chain A, Lipid-Free Human Apolipoprotein A-I	1.53815
Chain A, native heparin cofactor Ii	1.23689
Chain A, Plasmin	0.928959
Chain A, thyroxine-binding globulin	1.24335
Chain A, vitamin D binding protein	1.68373
Chain A,complement component 5	1.67365
Chain B, anti-P185-Her2 antibody 4d5	1.2221
Chain B, complement component C3c	1.13641
Chain B, Fab fragment of monoclonal antibody A5b7	1.31872
Chain C, immunoglobulin M	1.46943
Chain H, Fv from Igm Anti-Peptide Antibody	1.85542
Chain H, immunoglobulins IgG1, Lambda-Typ	1.49581
Chain H, serine protease inhibition Motif	1.39962
Chain H, thrombin	1.4767
Chain I, Antithrombin-Iii	1.06914
Chain I, Antithrombin-S195a Factor Xa	0.995346
Chain L, IgM rheumatoid factor Fab	1.08304
Chain L, anti-Erbb2 Fab2c4	1.01983
Chain L, Anti-Hiv-1 Gp120 reactive antibody 48d	1.65826
Chain L, Fab fragment from Hiv-1 neutralizing antibody 2f5	1.17139
Chain L, glycosylated Fab From IgM Cryoglobulin	0.883874
Chain L, Hiv-1 Gp120	1.68777
Cholesteryl ester transfer protein precursor	1.35418
Cholinesterase precursor	1.65145
Chondroitin sulfate synthase 3	0.39
Chromodomain helicase DNA binding protein 3, isoform 3	1.85
Chromosome 1 open reading frame 159	2.59
Ciliary dynein heavy chain 5	1.67
CLASP2 Putative uncharacterized protein	0.23
CLIP-associating protein 2	0.23
Clusterin precursor	0.38
Complement C1q subcomponent subunit C precursor	0.72
Complement C1s subcomponent precursor	0.929644
Complement C4B1	1.59841
Complement C8-beta propetide	0.912992
Complement component 1	1.25
Complement component 1, R subcomponent-like precursor	1.19811
Complement component 3, isoform CRA_a	1.17375
Complement component 4A (Rodgers blood group)	1.08805
Complement component 8, gamma polypeptide	0.929984
Complement component C3	1.37014
Complement component C4	1.02151
Complement component C4A	1.20991
Complement component C5	1.15033
Complement cytolysis inhibitor precursor	1.53057
Complement factor B	0.948724
Complement factor H	1.33864
Complement protein C7 precursor	1.17304
Complement protein C9	1.58226
Completement component C6	1.03272
Corticosteroid-binding globulin	1.65707
CP 97 kDa protein	1.006
CP protein	0.94655
C-reactive protein	1.536
Cystatin C	0.897505
Cysteine-rich BMP regulator 2	0.69
DmX-like protein 1	0.25
EPC-1	0.871251
Factor B	0.873896
Factor VII active site mutant immunoconjugate	1.68
Fibrinopeptide A	1.1988
Fibronectin	1.00724
Filamin A, alpha	1.14
Filamin-A	1.13
Furin precursor	1.19
G protein-coupled receptor 98 precursor	1.23
Galectin-3-binding protein	1.30214
Gelsolin (amyloidosis, Finnish type)	1.28318
Gelsolin isoform a precursor	1.47257
Gigaxonin	0.94
GP120, ITI heavy chain-related protein (internal fragment)	2.10147
GREB1 protein isoform a	0.84
Growth-inhibiting protein 25	1.65113
GTF2B Transcription initiation factor IIB	0.15
Haptoglobin	1.57
Haptoglobin-related protein	0.70404
Hemicentin 1	0.62
Hemopexin precursor	1.3
Heparin cofactor 2 precursor	0.76
Highly similar to LAF-4 PROTEIN	0.75
Highly similar to Protein Tro alpha1 H, myeloma	1.295
HIP1 116 kDa protein	1.1
Histidine-rich glycoprotein precursor	1.38
Ig A alpha1 Bur	0.962786
Ig alpha-1 chain C region	1.55955
Ig alpha-2 chain C region	1.37659
Ig G1 H Nie	1.22203
Ig G2 pFc' PIG Gm	1.39814
Ig gamma-2 chain C region	1.33752
Ig H-chain V-region (DP-38)	0.498619
Ig heavy chain V-III region BRO	0.74
Ig heavy chain V-III region TEI	0.74
Ig kappa chain C region (allotype Inv(1,2)) (fragment)	0.897271
Ig kappa chain NIG26 precursor	1.94334
Ig kappa chain V region (anti-DNA, IC4) (fragment)	0.950272
Ig kappa chain V-III (KAU cold agglutinin)	0.968226
Ig kappa chain V-III region (Kas) (fragment)	0.785714
Ig kappa L I Den	1.12602
Ig lambda chain (Kol)	1.45219
Ig lambda chain V-III region LOI	1.75478
Ig lambda chain V-IV region (fragments)	1.23634
Ig lambda Sm L	1.11467
Ig mu heavy chain disease protein	0.5
IGHA1 protein	1.19312
IGHA1 Putative uncharacterzied protein	1.25
IGHD protein	0.823529
IGHG1 protein	1.47
IGHG3 protein	2.93
IGHG4 IGHG4 protein	2.855
IGHM protein	1.12
IGHV4-31 protein	0.74
IGKC protein	1.03
IGKV1-5 protein	0.741667
IGKV2-24 protein	0.63
Immunoglobulin alpha heavy chain variable region	0.865922
Immunoglobulin G kappa chain	0.876289
Immunoglobulin heavy chain	1.19748
Immunoglobulin heavy chain constant region alpha 1	0.952221
Immunoglobulin heavy chain constant region gamma 4	1.4992
Immunoglobulin heavy chain constant region kappa	1.49322
Immunoglobulin heavy chain variable region	1.1
Immunoglobulin heavy chain VDJC region	1.84775
Immunoglobulin heavy chain, constant region	1.05528
Immunoglobulin J chain	1.27791
Immunoglobulin kappa 4 light chain	2.54351
Immunoglobulin kappa light chain	1.25815
Immunoglobulin kappa light chain VLJ region	1.67047
Immunoglobulin lambda 2 light chain	2.59386
Immunoglobulin lambda light chain	1.27
Immunoglobulin lambda light chain VLJ region	2.6946
Immunoglobulin light chain	1.27669
Immunoglobulin light chain variable region	1.4811
Immunoglobulin M heavy chain	1.36275
Immunoglobulin rearranged light chain	1.85488
Immunoglobulin V(H) gene V-D-J	0.894982
Insulin-like growth factor binding protein, peptide partial, 18 aa	1.09087
Insulin-like growth factor-binding protein complex acid labile subunit isoform 2 precursor	1.66919
Inter-alpha (globulin) inhibitor H2	1.5094
Inter-alpha (globulin) inhibitor H2, isoform CRA_a	1.34909
Inter-alpha (globulin) inhibitor H4 (plasma Kallikrein-sensitive glycoprotein) variant	1.61088
Inter-alpha-trypsin inhibitor C-terminal	0.939148
Inter-alpha-trypsin inhibitor family heavy chain-related protein	1.82896
Inter-alpha-trypsin inhibitor family heavy chain-related protein (IHRP)	1.40318
Inter-alpha-trypsin inhibitor heavy chain	1.9475
Inter-alpha-trypsin inhibitor heavy chain H1 precursor	0.97
Inter-alpha-trypsin inhibitor heavy chain H2	1.6898
Inter-alpha-trypsin inhibitor heavy chain H4 ITIH4	1.8
Inter-alpha-trypsin inhibitor heavy chain ITIH1	1.70729
Isoform 1 of Alpha-1-antichymotrypsin precursor	0.958
Isoform 1 of ATP-binding cassette sub-family A member 13	0.5
Isoform 1 of Chromodomain-helicase-DNA-binding protein 3	2
Isoform 1 of Ciliary dynein heavy chain 8	2.07
Isoform 1 of Complement factor B precursor (Fragment)	0.7225
Isoform 1 of Exocyst complex component 1	1.74
Isoform 1 of Fez family zinc finger protein 2	1.07
Isoform 1 of Fibrinogen alpha chain precursor	1.05
Isoform 1 of G-protein coupled receptor 98 precursor	1.23
Isoform 1 of Granulocyte colony-stimulating factor receptor precursor	0.5
Isoform 1 of Haptoglobin-related protein precursor	0.856
Isoform 1 of Hydrocephalus-inducing protein homolog	1.21
Isoform 1 of Lysine-specific histone demethylase 1	0.45
Isoform 1 of Mitogen-activated protein kinase kinase kinase 7-interacting protein 2	0.35
Isoform 1 of Myeloid/lymphoid or mixed-lineage leukemia protein 2	2.77
Isoform 1 of Probable ATP-dependent RNA helicase DHX40	1.05
Isoform 1 of Protein DGCR8	0.5
Isoform 1 of Protein FAM35A	1
Isoform 1 of Protein inscuteable homolog	3.03
Isoform 1 of Protocadherin gamma A3 precursor	2.95
Isoform 1 of Putative helicase Mov10l1	0.52
Isoform 1 of Putative splicing factor, arginine/serine-rich 14	2
Isoform 1 of Sec1 family domain-containing protein 2	0.93
Isoform 1 of Serine/threonine-protein kinase PINK1, mitochondrial precursor	0.86
Isoform 1 of Serum albumin precursor	1.14
Isoform 1 of Uncharacterized protein C19orf61	1.08
Isoform 1 of Uncharacterized protein C1orf159 precursor	2.59
Isoform 1 of Zinc finger UBR1-type protein 1	1.14
Isoform 10 of Voltage-dependent T-type calcium channel subunit alpha-1G	3.43
Isoform 2 of Ciliary dynein heavy chain 8	2.07
Isoform 2 of Fibrinogen alpha chain precursor	1.05
Isoform 2 of Haptoglobin-related protein precursor	0.788
Isoform 2 of Hemicentin-1 precursor	0.62
Isoform 2 of Inter-alpha-trypsin inhibitor heavy chain H4 precursor	0.66
Isoform 2 of Lysine-specific histone demethylase 1	1.84
Isoform 2 of Myb-binding protein 1A	0.72
Isoform 2 of Myeloid/lymphoid or mixed-lineage leukemia protein 2	2.77
Isoform 2 of Protein FAM35A	1.27
Isoform 2 of Protocadherin gamma A3 precursor	2.95
Isoform 2 of Reelin precursor	1
Isoform 2 of Serine/threonine-protein kinase PINK1, mitochondrial precursor	0.86
Isoform 2 of Serum albumin precursor	2.798
Isoform 2 of Uncharacterized protein C19orf61	1.08
Isoform 2 of Uncharacterized protein C1orf159 precursor	1.01
Isoform 2 of Zinc finger homeobox protein 4	0.82
Isoform 2 of Zinc finger UBR1-type protein 1	1.14
Isoform 3 of Myeloid/lymphoid or mixed-lineage leukemia protein 2	2.77
Isoform 3 of NAD-dependent deacetylase sirtuin-2	0.74
Isoform 3 of Probable ATP-dependent RNA helicase DHX40	1.05
Isoform 3 of Protein DGCR8	0.5
Isoform 3 of Zinc finger UBR1-type protein 1	1.14
Isoform 4 of Zinc finger UBR1-type protein 1	1.14
Isoform A of Alpha-fetoprotein enhancer-binding protein	2.2
Isoform Beta-2 of DNA topoisomerase 2-beta	1.78
Isoform HMW of Kininogen-1 precursor	1.98333
Isoform LMW of Kininogen-1 precursor	1
JC-kappa protein	2
Kallistatin	1.28287
Keratin 1	1.44849
Keratin-associated protein 19-6	0.73
KIAA0575 protein	0.59
KIAA1411	2.58
Kininogen 1	1.675
Kininogen-1 isoform 2	1.3104
KNG1 protein	0.995
Lambda L-chain C region	1.18332
Leucine-rich alpha-2-glycoprotein precursor	1.43
Leucine-rich repeat serine/threonine-protein kinase 2	0.36
Leuserpin 2 (hLS2) precursor	1.08676
LOC152485 protein	2.73
Low-density lipoprotein receptor-related protein 5 precursor	2.55
LRRK2 Protein	0.335
Lumican	0.728313
Lumican precursor	0.53
Mannose-binding protein C precursor	0.755826
MHC factor B precursor peptide	1.40603
Microtubule-associated protein 1B	1.28
microtubule-associated protein 1B isoform 2	1.28
MLLT6 Protein AF-17	3.58
Mucin 6, gastric	1.745
Mucin-6 precursor	1.255
Myeloid/lymphoid or mixed-lineage leukemia 2	2.77
Nesprin-1 isoform 2	3.05674
Nidogen-2	0.28
Nidogen-2 precursor	0.28
Nitrous oxide reductase, N-terminal domain containing protein	1.06
OK/SW-CL.89	1.01
Phosphate-regulating neutral endopeptidase	0.66
Pigment epithelial-differentiating factor	1.54703
Pigment epithelium-derived factor precursor	1.45
Plasma protease (C1) inhibitor precursor	2.4
Plasma retinol-binding protein precursor	0.67
Plasminogen	1.14052
Plasminogen 1-69	1.2902
Plasminogen precursor	2.595
Plastin 3	0.685
Platelet basic protein preproprotein	1.85
Polycystic kidney disease 1-like protein 3	1.32
Prealbumin	0.961318
Prealbumin variant	0.929984
Prepro-C3b/C4B inactivator	0.940017
Pre-serum amyloid P component	1.3665
PRO1851	0.912178
PRO2275	0.56
PRO2743	1.48933
Proapolipoprotein	1.31036
Protein AMBP preproprotein	1.54051
Protein Rei, Bence-Jones	1.20013
Protein Tro alpha1 H, myeloma	0.917699
protocadherin gamma subfamily A, 3 isoform 1 precursor	2.95
Purinoceptor 7	0.92
Putative uncharacterized protein	0.814
Ran-binding protein 17	1.99
Recombinant IgG4 heavy chain	3.94068
Retinol binding protein 4, plasma	0.82
Rhesus blood group-associated glycoprotein	0.28
Serine (or cysteine) proteinase inhibitor, clade A, member 3 precursor variant	1.30517
Serine/threonine-protein kinase 11	1.1
Serine-threonine protein kinase NKIAMRE	1.28209
Serotransferrin precursor	1.98
SERPINC1 protein	1.325
Serum albumin	1.18283
Serum amyloid P-component precursor	1.72667
Serum paraoxonase/arylesterase 1	0.635271
SGT1 protein	5.03
Similar to Complement C3 precursor	0.898
similar to cysteine rich BMP regulator 2	0.69
Similar to Mitochondrial 2-oxodicarboxylate carrier	0.74
Similar to SET domain containing 1A	0.56
Solute carrier family 12 member 3	0.74
SP40,40'	1.51951
Testis-expressed sequence 10 protein	1.16
Tetranectin	1.5446
Thyroxine-binding globulin (Serpin A7)	0.663246
Thyroxine-binding globulin precursor	0.985
Titin isoform novex-1	1.37
Titin isoform novex-2	1.385
TMEM110 101 kDa protein	0.66
Transferrin	1.27983
Transthyretin precursor	1.435
Truncated alpha 1-antitrypsin	1.4177
Trypsin inhibitor	1.27909
Vitamin D-binding protein	1.50217
Vitamin D-binding protein isoform 1 precursor	1.22637
Vitronectin	1.3805
Vitronectin precursor	1.09
VWA2 CDNA FLJ16213 fis, clone CTONG2024206	1.05
VWA2 protein	1.05
Weakly similar to Microtubule associated-protein	0.23
Zinc finger homeodomain 4	0.94
Zinc finger protein 354B	0.4
Zinc finger protein 592	0.75
Zinc finger, FYVE domain containing 26	1.06
Zn-alpha2-glycoprotein	1.35622
